# Supplementary material for: Distinct green electroluminescence from lead-free CsCuBr2 halide micro-crosses
Source: Royal Society of Chemistry journal article supplement (doi:10.1039/c8cc09265f), 2019-01-01
Supplement: c8cc09265f1.pdf [file c8cc09265f1.pdf]

## Supporting Information

### **Distinct green electroluminescence from lead-free CsCuBr<sub>2</sub> halide microcrosses**

Tao Li,<sup>a</sup> Xiaoming Mo,<sup>\*a,b</sup> Chengyu Peng,<sup>a</sup> Qiuchun Lu,<sup>a</sup> Chengjun Qi,<sup>a</sup> Xiaoma Tao,<sup>a</sup> Yifang Ouyang<sup>a</sup> and Yulu Zhou,<sup>a\*</sup>

<sup>a</sup> Guangxi Key Laboratory for Relativistic Astrophysics, School of Physical Science and Technology, Guangxi University, Nanning, Guangxi 530004, People's Republic of China.

<sup>b</sup> Center on Nanoenergy Research, School of Physical Science and Technology, Guangxi University, Nanning, Guangxi 530004, People's Republic of China.

Corresponding author: [xmmo@gxu.edu.cn](mailto:xmmo@gxu.edu.cn) (Xiaoming Mo); [zhouyulu1125@aliyun.com](mailto:zhouyulu1125@aliyun.com) (Yulu Zhou).

## Experimental Section

### Sample preparation

Prior to producing CsCuBr<sub>2</sub> MCs, Cs<sub>3</sub>Cu<sub>2</sub>Br<sub>5</sub> micro-rods (MRs) was firstly synthesized by a one-pot solution method, in which 5 mL of dimethyl sulfoxide (DMSO, >99.8%), 1 mL of oleic acid (OA, 85%), 0.42 mmol of CsBr (99.5%) and 0.4 mmol of CuBr<sub>2</sub> (99%) were loaded into a 50 mL three-neck flask and reacted in a water bath at 70 °C for 5 h. When the reaction was finished, the crude solution was precipitated by 50 mL of dichloromethane (DCM, 99.5%) and the resultant Cs<sub>3</sub>Cu<sub>2</sub>Br<sub>5</sub> precipitate was separated via centrifugation. After being washed by ethyl acetate (EA, 99.5%) for several times, Cs<sub>3</sub>Cu<sub>2</sub>Br<sub>5</sub> powder was obtained by drying the Cs<sub>3</sub>Cu<sub>2</sub>Br<sub>5</sub> precipitate under vacuum at 70 °C for 0.5 h. Afterwards, 0.08 g of Cs<sub>3</sub>Cu<sub>2</sub>Br<sub>5</sub> and 1 mL of N,N-dimethylformamide (DMF, 99.5%) were mixed in a glass vial. The suspended mixed solution was then spin-casted onto pre-cleaned p-Si substrates under 1500 rpm for 40 s and dried at 90 °C for 20 min to produce a thin CsCuBr<sub>2</sub> MCs film on the p-Si substrates.

### Characterization

Scanning electron microscopy (SEM) images of the samples were measured in electron probe microanalyzer (EPMA, JEOL JXA-8230). Energy dispersive X-ray spectrometer (EDS) characterizations were performed by Oxford Instruments X-Max<sup>N</sup> that was coupled to the EPMA. X-band (9.44 GHz) electron paramagnetic resonance (EPR) measurements were carried out by using JEOL JES-FA300. X-ray diffraction (XRD) was introduced to characterize the crystal structure (Rigaku MiniFlex600, Cu K $\alpha$  radiation). X-ray photoelectron spectrometer (XPS) analysis was carried out in Thermo Scientific ESCALAB 250Xi.

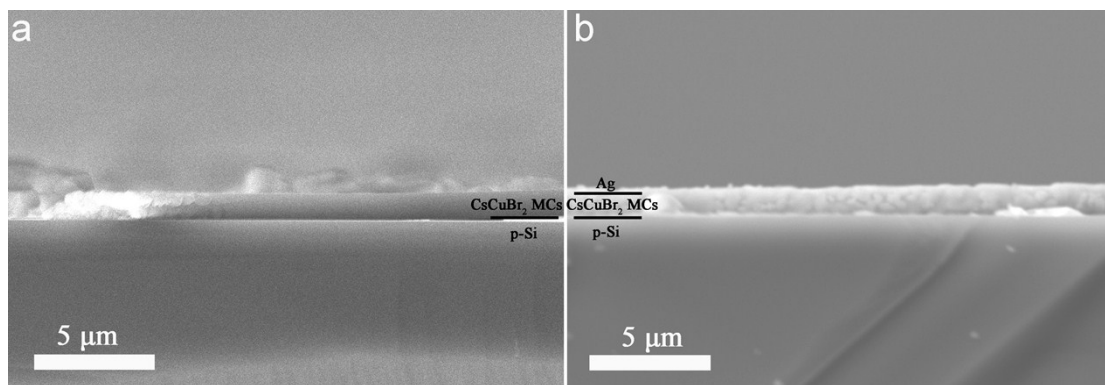

**Fig. S1** Cross-sectional images of (a) CsCuBr<sub>2</sub> MCs/p-Si and (b) Ag/CsCuBr<sub>2</sub> MCs/p-Si heterojunctions. The thicknesses of the CsCuBr<sub>2</sub> MCs and the Ag electrode are measured as ~1.1 μm and ~90 nm, respectively.

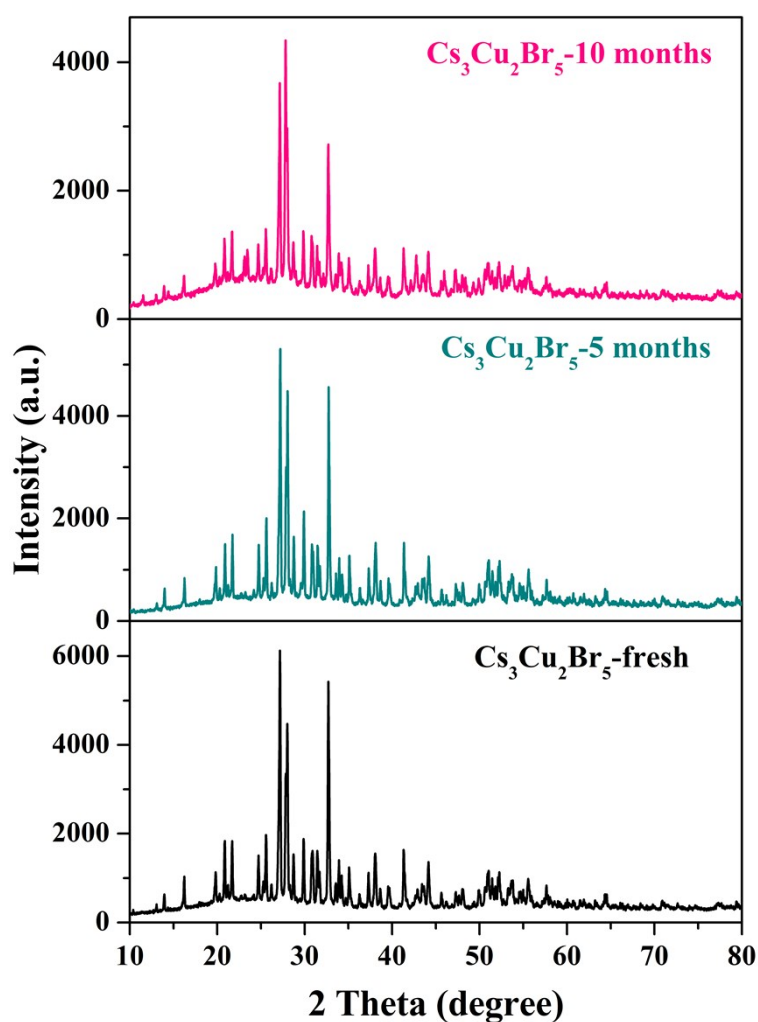

**Fig. S2** XRD patterns of Cs<sub>3</sub>Cu<sub>2</sub>Br<sub>5</sub> MRs with different storage time in air at room temperature (Relative Humidity: ~30%). Preservation of all the diffraction peaks even after 10 months firmly proves the long-term stability of the crystal structure of the Cs<sub>3</sub>Cu<sub>2</sub>Br<sub>5</sub> MRs in air.

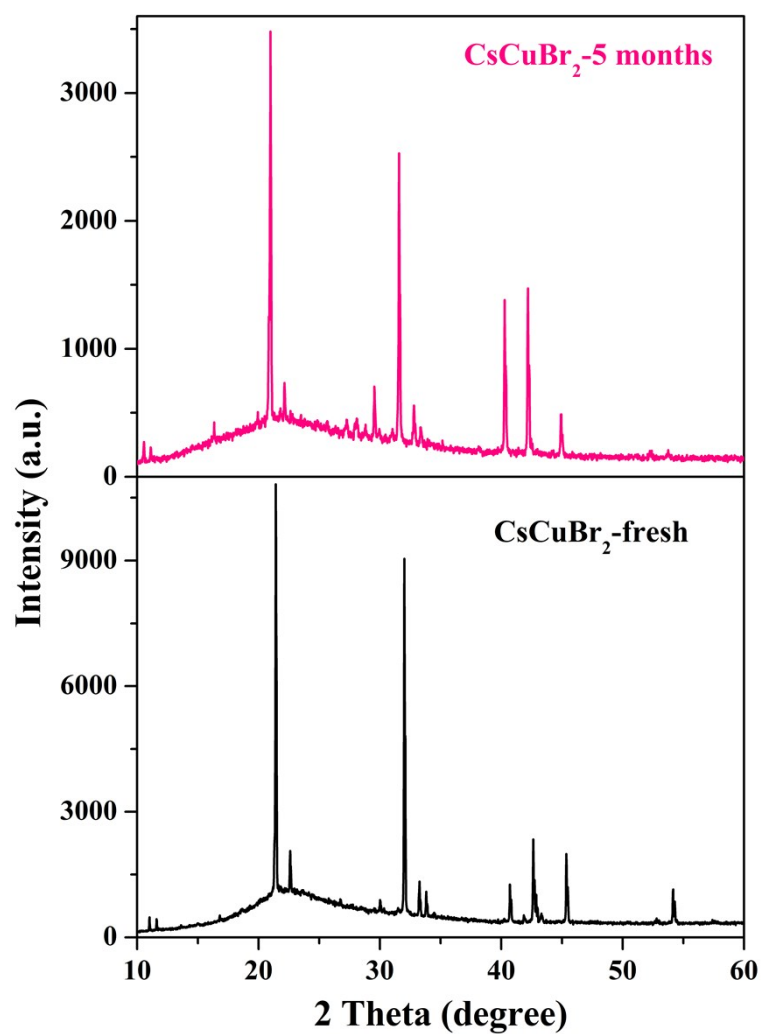

**Fig. S3** XRD patterns of CsCuBr<sub>2</sub> MCs with different storage time in air at room temperature (Relative Humidity: ~30%). All the diffraction peaks are preserved after storage in air for 5 months, which strongly proves the long-term stability of the CsCuBr<sub>2</sub> MCs in air.

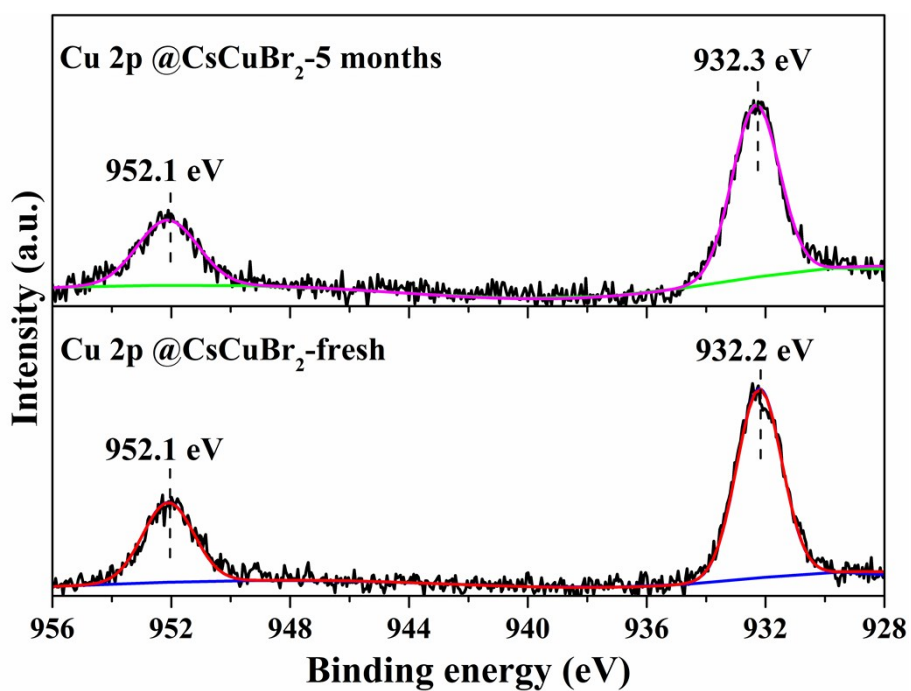

**Fig. S4** Cu 2p XPS spectra of the CsCuBr<sub>2</sub> MCs with different storage time in air at room temperature (Relative Humidity: ~30%). Both of the two peaks located around 952.1 and 932.2 eV—assigned to the Cu 2p<sub>1/2</sub> and Cu 2p<sub>3/2</sub>, respectively—remain unchanged, strongly verifying the long-term stability of Cu<sup>I</sup> in the CsCuBr<sub>2</sub> MCs in air even beyond 5 months.

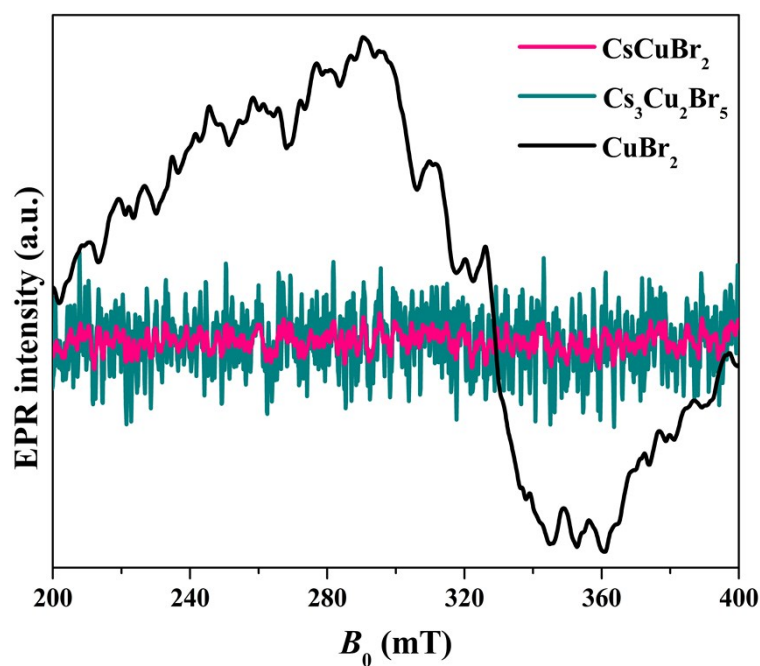

**Fig. S5** X-band (9.44 GHz) EPR spectra of  $\text{Cs}_3\text{Cu}_2\text{Br}_5$  MRs and  $\text{CsCuBr}_2$  MCs at room temperature, with  $\text{CuBr}_2$  powder as the reference (the same as those used to synthesize the  $\text{Cs}_3\text{Cu}_2\text{Br}_5$  MRs and  $\text{CsCuBr}_2$  MCs), for which the value of proportionality factor (g-factor) is 2.045. In comparison with the  $\text{CuBr}_2$ , the absence of the EPR signal of  $\text{Cu}^{\text{II}}$  in the  $\text{Cs}_3\text{Cu}_2\text{Br}_5$  MRs and  $\text{CsCuBr}_2$  MCs samples verifies that  $\text{Cu}^{\text{II}}$  is reduced to  $\text{Cu}^{\text{I}}$  or  $\text{Cu}^0$  [1-4]. Since the patterns corresponding to  $\text{Cu}^0$  cannot be found in the XRD results (see Fig. 2), it can be concluded that the oxidation of copper in the  $\text{Cs}_3\text{Cu}_2\text{Br}_5$  MRs and  $\text{CsCuBr}_2$  MCs is  $\text{Cu}^{\text{I}}$ .

**Table S1** Chemical composition data from different CsCuBr<sub>2</sub> MCs by EDS that is coupled to the EPMA.

| No.                         | Cs       | Cu       | Br       | Total |
|-----------------------------|----------|----------|----------|-------|
| 1                           | 0.262947 | 0.281053 | 0.456    | 1     |
| 2                           | 0.264391 | 0.269531 | 0.466077 | 1     |
| 3                           | 0.260038 | 0.287626 | 0.452335 | 1     |
| 4                           | 0.262287 | 0.27782  | 0.459893 | 1     |
| 5                           | 0.263062 | 0.280613 | 0.456324 | 1     |
| 6                           | 0.277256 | 0.257184 | 0.46556  | 1     |
| 7                           | 0.255976 | 0.282269 | 0.461756 | 1     |
| 8                           | 0.265644 | 0.265042 | 0.469314 | 1     |
| 9                           | 0.264026 | 0.274566 | 0.461408 | 1     |
| 10                          | 0.258979 | 0.266065 | 0.474956 | 1     |
| 11                          | 0.266956 | 0.245339 | 0.487704 | 1     |
| 12                          | 0.274813 | 0.267876 | 0.457311 | 1     |
| 13                          | 0.248495 | 0.270306 | 0.481199 | 1     |
| 14                          | 0.265468 | 0.27901  | 0.455522 | 1     |
| 15                          | 0.277185 | 0.266657 | 0.456159 | 1     |
| 16                          | 0.247294 | 0.265333 | 0.487373 | 1     |
| 17                          | 0.262118 | 0.278718 | 0.459163 | 1     |
| 18                          | 0.262566 | 0.262771 | 0.474663 | 1     |
| 19                          | 0.250516 | 0.284331 | 0.465152 | 1     |
| 20                          | 0.247018 | 0.276438 | 0.476544 | 1     |
| <b>Average</b>              | 0.261852 | 0.271927 | 0.466221 | 1     |
| <b>Sigma<br/>(variance)</b> | 0.008866 | 0.010286 | 0.010814 |       |

## Reference

- [1] A. Aboukaïs, A. Bennani, C. Lamonier-Dulongpont, E. Abi-Aad, and G. Wrobel, Redox behaviour of copper(II) species on CuCe oxide catalysts: electron paramagnetic resonance (EPR) study, *Colloids Surfaces A*, 1996, **115**, 171-177.
- [2] N. Y. Garces, L. Wang, L. Bai, N. C. Giles, and L. E. Halliburton, Role of copper in the green luminescence from ZnO crystals, *Appl. Phys. Lett.*, 2002, **81**, 622.
- [3] R.-A. Eichel, M. D. Drahus, P. Jakes, E. Erünal, E. Erdem, S.K.S. Parashar, H. Kungl, and M. J. Hoffmann, Defect structure and formation of defect complexes in Cu<sup>2+</sup>-modified metal oxides derived from a spin-Hamiltonian parameter analysis, *Mol. Phys.*, 2009, **107**, 1981-1986.
- [4] W. Jo, J.-B. Ollagnier, J.-L. Park, E.-M. Anton, O.-J. Kwon, C. Park, H.-H. Seo, J.-S. Lee, E. Erdem, R.-A. Eichel, and J. Rödel, CuO as a sintering additive for (Bi<sub>1/2</sub>Na<sub>1/2</sub>)TiO<sub>3</sub>-BaTiO<sub>3</sub>-(K<sub>0.5</sub>Na<sub>0.5</sub>)NbO<sub>3</sub> lead-free piezoceramics, *J. Eur. Ceram. Soc.*, 2011, **31**, 2107-2117.
